# Supplementary material for: A sensitive electrochemical sensor based on CoWO4/multi-walled carbon nanotubes for the selective determination of chlorpromazine hydrochloride
Source: Royal Society of Chemistry journal article supplement (doi:10.1039/d4an01298d), 2024-11-15
Supplement: d4an01298d1.pdf [file d4an01298d1.pdf]

Supplementary Information

# **A sensitive electrochemical sensor based on CoWO<sub>4</sub>/multi-walled carbon nanotubes composites for the selective determination of chlorpromazine hydrochloride**

Si Zeng,<sup>a</sup> Peiyao Zhu,<sup>a</sup> Deyu Liu,<sup>a</sup> Yongmei Hu,<sup>a</sup> Qitong Huang,<sup>\*a,b</sup> and Haiping Huang,<sup>\*a</sup>

<sup>a</sup> Key Laboratory of Testing and Tracing of Rare Earth Products for State Market Regulation, School of Chemistry and Chemical Engineering, Jiangxi University of Science and Technology, Ganzhou, 341000, China.

<sup>b</sup> School of Medical and Information Engineering, The Science Research Center, Gannan Medical University, Ganzhou, China

## **1. Experimental section**

### **1.1. Materials and apparatus**

Cobalt nitrate (Co(NO<sub>3</sub>)<sub>3</sub>·6H<sub>2</sub>O), sodium tungstate (NaWO<sub>4</sub>·2H<sub>2</sub>O), cetyltrimethylammonium bromide (CTAB) and chlorpromazine hydrochloride were got from Aladdin Reagent (Shanghai) Co., Ltd. All chemicals were of analytical grade and used without further purification. Carbon nanotubes (CNTs) purchased from Nanjing Xianfeng Nano Materials Co., Ltd. Electrochemical analysis was done on electrochemical workstation (CHI660D, Shanghai, China). The morphology observations were performed on a scanning electron microscope (SEM, Hitachi S-4700 II). Energy dispersive spectroscopy (EDS) was used to analyze the chemical composition of the selected area. The catalysts were evaluated by X-ray diffraction (XRD), scanning from 10° to 80° at a scan rate of 2°·minute<sup>-1</sup> using quartz monochromatic Cu Kα1 radiation source (λ = 0.1541 nm). X-ray photoelectron spectroscopy ((XPS, Thermo Scientific, American) spectra were recorded by a Physical Electronics PHI 5000 Versa probe spectrometer with Al Kα radiation (1468 eV).

### **1.2. Synthesis of CoWO<sub>4</sub> and CoWO<sub>4</sub>/MWCNTs**

The CoWO<sub>4</sub> nanomaterial was synthesized according to the reported methods [1]. First of all, 600 mg of CTAB was dissolved in a mixture consisting of ethanol (15 mL) and ultra-pure water (25 mL). This solution was divided into 2 equal parts solution (1) and solution (2). Dropwise additions of 10 mM of Co(NO<sub>3</sub>)<sub>3</sub>·6H<sub>2</sub>O and 10 mM of NaWO<sub>4</sub>·2H<sub>2</sub>O were added to solution (1) and solution (2), respectively. After stirring solutions (1) and (2) for 30 minutes, the solution (2) was poured into solution (1) to get a violet-colored solution. After stirring the mixture for 1 hours, the subsequent mixture was then placed in 80 mL Teflon vessel inside the stainless-steel jacket under heating conditions in the air at 180°C for 12 hours. After completion of the reaction, material was centrifuged, further repeatedly rinsed using water and ethanol to remove all traces of

CTAB. Dry the product at 70°C for 12 hours in a vacuum drying oven. MWCNTs were chemically functionalized according to the reported methods with weeny modification [2].

To obtain CoWO<sub>4</sub>/MWCNT composite, the synthesized CoWO<sub>4</sub> and MWCNTs were mixed in a mass ratio of 1:3 and were sonicated in water for 30 minutes, followed by centrifugation to obtain the product.

### 1.3. Fabrication of CoWO<sub>4</sub>/MWCNTs/GCE

Bare GCE was firstly carefully polished with 0.05, 0.3 and 1 μm Al<sub>2</sub>O<sub>3</sub> powder to obtain a mirror-like surface. 2 mg of CoWO<sub>4</sub>/MWCNTs were dissolved completely in 1 mL of ultra-pure water and ultrasonicated for 10 minutes to form a uniform solution. For the fabrication of CoWO<sub>4</sub>/MWCNTs/GCE, 10 μL of CoWO<sub>4</sub>/MWCNTs suspension dropped onto the pre-cleaned electrode surface and dried at room temperature. The preparation process of CoWO<sub>4</sub>/GCE and MWCNTs/GCE is similar to that of CoWO<sub>4</sub>/MWCNTs/GCE.

### 1.4. Electrochemical measurement of CPZ

To investigate the peak current of CPZ, the phosphate buffer solution (PBS, 0.2M, pH = 7.0) was utilized as the supporting electrolyte. In the potential range of + 0.1 to + 0.8 V, the electrochemical detection behavior of CPZ was evaluated via Cyclic Voltammetry method with a conventional three-electrode system. The bare or modified GEC services as working electrode, platinum wire as counter electrode, and saturated calomel electrode as reference electrode. All measurements were taken at room temperature.

## Reference

1. V. P. Singh, G. Singh, R. Patel, U. K. Gaur and M. Sharma, *J. Environ. Chem. Eng.*, 2023, **11**(6), 111208.
2. S. Abedini, A. A. Rafati and A. Ghaffarinejad, *New J Chem.*, 2022, **46**(42), 20403-20411.
